# Supplementary material
Source: publisher figshare collection journal article supplement (https://sage.figshare.com/ndownloader/files/18044432)
Supplement: Supplementary file 1 [file 18044432]

59 2D texture features extracted from one phase CT images are listed as follows:

(1) gray level cooccurrence matrix (GLCM): 27 features.

Autocorrelation  
AverageIntensity  
ClusterProminence  
ClusterShade  
ClusterTendency  
Contrast  
Correlation  
DifferenceAverage  
DifferenceEntropy  
DifferenceVariance  
Dissimilarity  
Energy  
Entropy  
Homogeneity1  
Homogeneity2  
Imc1  
Imc2  
Idm  
Idmn  
Id  
Idn  
InverseVariance  
MaximumProbability  
SumAverage  
SumEntropy  
SumVariance  
SumSquares

(2) gray level run length matrix (GLRLM): 16 features.

ShortRunEmphasis  
LongRunEmphasis  
GrayLevelNonUniformity  
GrayLevelNonUniformityNormalized  
RunLengthNonUniformity  
RunLengthNonUniformityNormalized  
RunPercentage  
GrayLevelVariance  
RunVariance  
RunEntropy  
LowGrayLevelRunEmphasis  
HighGrayLevelRunEmphasis  
ShortRunLowGrayLevelEmphasis  
ShortRunHighGrayLevelEmphasis

LongRunLowGrayLevelEmphasis  
LongRunHighGrayLevelEmphasis  
(3) gray level size zone matrix (GLSZM): 16 features.  
SmallAreaEmphasis  
LargeAreaEmphasis  
GrayLevelNonUniformity  
GrayLevelNonUniformityNormalized  
SizeZoneNonUniformity  
SizeZoneNonUniformityNormalized  
ZonePercentage  
GrayLevelVariance  
ZoneVariance  
ZoneEntropy  
LowGrayLevelZoneEmphasis  
HighGrayLevelZoneEmphasis  
SmallAreaLowGrayLevelEmphasis  
SmallAreaHighGrayLevelEmphasis  
LargeAreaLowGrayLevelEmphasis  
LargeAreaHighGrayLevelEmphasis

There are 177 2D texture features extracted from three phase CT images ( $59 \times 3 = 177$ ).

Compared with 2D texture features, 3D texture features extracted from one phase CT images have 2 more GLCM features: SumVariance1 and SumVariance2. Therefore, there are 183 3D texture features extracted from three phase CT images ( $61 \times 3 = 183$ ).
